# Supplementary material
Source: Elsevier journal article supplement (https://www.sciencedirect.com/science/article/pii/S0001731021004427)
Supplement: mmc1 [file S0001731021004427:mmc1.pdf]

Tabla 1. Criterios diagnósticos para el Síndrome de Ehlers-Danlos hiper móvil.  
Adaptado del Consorcio Internacional sobre el Síndrome de Ehlers-Danlos y Trastornos asociados de 2017<sup>1</sup>.

| <b>Criterio 1- Hiper movilidad articular generalizada - Escala de Beighton *</b>                                                                   | <b>Criterio 2 - deben presentarse ≥2 de las siguientes características (A, B, C)</b>                                                                                                                                                                                                                                                                                                                                                                                                                                                                                                                                                                                                                                                                                                                                                                                                   | <b>Criterio 3 - DEBEN cumplirse todos los requisitos previos siguientes</b>                                                                                                                                                                    |
|----------------------------------------------------------------------------------------------------------------------------------------------------|----------------------------------------------------------------------------------------------------------------------------------------------------------------------------------------------------------------------------------------------------------------------------------------------------------------------------------------------------------------------------------------------------------------------------------------------------------------------------------------------------------------------------------------------------------------------------------------------------------------------------------------------------------------------------------------------------------------------------------------------------------------------------------------------------------------------------------------------------------------------------------------|------------------------------------------------------------------------------------------------------------------------------------------------------------------------------------------------------------------------------------------------|
| <p>≥6 niños pre-púberes y adolescentes</p> <p>≥5 varones y mujeres púberes hasta los 50 años **</p> <p>≥4 varones y mujeres mayores de 50 años</p> | <p>Característica A (≥ 5 de las siguientes)</p> <ol style="list-style-type: none"> <li>1. Piel inusualmente suave o aterciopelada **</li> <li>2. Hipersensibilidad cutánea leve**</li> <li>3. Estrías de distensión o rojas inexplicadas en espalda, ingles, muslos, mamas y/o abdomen en adolescentes, varones y mujeres pre-púberes sin antecedentes de ganancia o pérdidas significativas de grasa corporal o peso</li> <li>4. Pápulas piezogénicas bilaterales en el talón**</li> <li>5. Hernia(s) abdominales recurrentes o múltiples</li> <li>6. Cicatrices atróficas que comprometen al menos dos sitios y sin formación de cicatrices papiráceas y/o hemosiderinas reales según se aprecia en el EDS clásico **</li> <li>7. Prolapso del suelo pélvico, rectal, y/o uterino en niños, varones o mujeres nulíparas sin historia de obesidad mórbida u otra situación</li> </ol> | <p>Ausencia de fragilidad cutánea inusual, que conllevaría la consideración de otros tipos de EDS</p> <p>Exclusión de otros trastornos del tejido conectivo hereditarios y adquiridos, incluyendo situaciones reumatológicas autoinmunes**</p> |

|                                                                                                                                                                                                                                                                                                                                                                                                                                                                                                                                                                        |                                                                                                                                                                                                                                                                                                                                                                                                                                                                                                           |                                                                                                                                                                                                                                                                                                                |
|------------------------------------------------------------------------------------------------------------------------------------------------------------------------------------------------------------------------------------------------------------------------------------------------------------------------------------------------------------------------------------------------------------------------------------------------------------------------------------------------------------------------------------------------------------------------|-----------------------------------------------------------------------------------------------------------------------------------------------------------------------------------------------------------------------------------------------------------------------------------------------------------------------------------------------------------------------------------------------------------------------------------------------------------------------------------------------------------|----------------------------------------------------------------------------------------------------------------------------------------------------------------------------------------------------------------------------------------------------------------------------------------------------------------|
|                                                                                                                                                                                                                                                                                                                                                                                                                                                                                                                                                                        | <p>médica predisponente conocida</p> <p>8. Apiñamiento dental y paladar ojival o estrecho **</p> <p>9. Aracnodactilidad, según la definición de uno o más de los siguientes: (i) signo de la muñeca positivo (signo de Walker) en ambos lados, (ii) signo del pulgar positivo (signo de Steinberg) en ambos lados</p> <p>10. Ratio ancho-alto del brazo <math>\geq 1,05</math></p> <p>11. PVM leve o mayor basado en criterios ecocardiográficos estrictos**</p> <p>12. Dilatación de la raíz aórtica</p> |                                                                                                                                                                                                                                                                                                                |
| <p>Si la puntuación Beighton es un punto inferior al punto de corte específico de la edad y sexo, deberán elegirse dos o más de entre los criterios siguientes:</p> <p>1. ¿Puede Vd. (o ha podido) colocar las manos en el suelo sin doblar las rodillas?</p> <p>2. ¿Puede Vd. (o ha podido) doblar el pulgar y tocar el antebrazo?</p> <p>3. Cuando era niño, ¿se divertía Vd. con sus amigos contorsionando su cuerpo y adoptando formas extrañas, o podía abrirse de piernas?</p> <p>4. Cuando era niño o adolescente, ¿se dislocó el hombro o la rótula en más</p> | <p>Característica B</p> <p>1. Historia familiar positiva; uno o más familiares de primer grado que cumplan independientemente los criterios actuales para hEDS**</p>                                                                                                                                                                                                                                                                                                                                      | <p>En pacientes con ETC (ej.: Lupus, artritis reumatoide, etc.), el diagnóstico adicional de hEDS requiere cumplir las Características A y B del Criterio 2. La característica C del Criterio 2 (dolor crónico y/o inestabilidad) no puede considerarse para un diagnóstico de hEDS en esta situación. ***</p> |

|                                                               |  |  |
|---------------------------------------------------------------|--|--|
| de una ocasión?                                               |  |  |
| 5. ¿Se considera Vd. una persona con “articulaciones dobles”? |  |  |
